# Supplementary material for: Prognostic Value of Pretreatment Lymphocyte-to-Monocyte Ratio in Lung Cancer: A Systematic Review and Meta-Analysis
Source: PubMed Central journal article supplement — Technol Cancer Res Treat. 2021 Feb 12;20:1533033820983085. doi: 10.1177/1533033820983085 (PMC7887688; doi:10.1177/1533033820983085), 2021-02-12
Supplement: sj-pdf-1-tct-10.1177_1533033820983085.pdf [file sj-pdf-1-tct-10.1177_1533033820983085.pdf]

**STable 3 Hierarchical analysis of correlation between LMR and PFS in lung cancer patients**

|                           | No. of studies | Combined HR (95% CI) | P value | P <sub>interaction</sub> value | Heterogeneity |                | Residual heterogeneity |
|---------------------------|----------------|----------------------|---------|--------------------------------|---------------|----------------|------------------------|
|                           |                |                      |         |                                | P             | I <sup>2</sup> | I <sup>2</sup>         |
| <b>Total PFS</b>          | 11             | 1.49 (1.34, 1.67)    | <0.01   | —                              | 0.77          | 0%             | —                      |
| <i>Histology</i>          |                |                      |         |                                |               |                | 0%                     |
| NSCLC                     | 10             | 1.49 (1.33, 1.68)    | <0.01   | 0.96                           | 0.68          | 0%             |                        |
| SCLC                      | 1              | 1.51 (1.06, 2.16)    | 0.02    |                                | —             | —              |                        |
| <i>Tumor stage</i>        |                |                      |         |                                |               |                | 0%                     |
| ED                        | 6              | 1.48 (1.28, 1.72)    | <0.01   | 0.98                           | 0.27          | 21%            |                        |
| LD                        | 4              | 1.51 (1.25, 1.83)    | <0.01   |                                | 0.99          | 0%             |                        |
| LD and ED                 | 1              | 1.51 (1.06, 2.16)    | 0.02    |                                | —             | —              |                        |
| <i>Treatment</i>          |                |                      |         |                                |               |                | 24%                    |
| Chemotherapy              | 4              | 1.42 (1.22, 1.65)    | <0.01   | 0.72                           | 0.37          | 4%             |                        |
| TKI                       | 2              | 1.91 (1.27, 2.86)    | <0.01   |                                | 0.27          | 17%            |                        |
| Chemotherapy+TKI          | 1              | 1.61 (1.19, 2.16)    | <0.01   |                                | —             | —              |                        |
| Immunology                | 3              | 1.49 (1.12, 1.99)    | <0.01   |                                | 0.96          | 0%             |                        |
| Chemotherapy+Radiotherapy | 1              | 1.51 (1.06, 2.16)    | 0.02    |                                | —             | —              |                        |
| <i>Sample size</i>        |                |                      |         |                                |               |                | 0%                     |
| >300                      | 3              | 1.41(1.20, 1.65)     | <0.01   | 0.30                           | 0.22          | 35%            |                        |
| <300                      | 8              | 1.58 (1.35, 1.85)    | <0.01   |                                | 0.94          | 0%             |                        |
| <i>Cut-off value</i>      |                |                      |         |                                |               |                | 0%                     |
| >4                        | 3              | 1.52 (1.28, 1.80)    | <0.01   | 0.79                           | 1.00          | 0%             |                        |
| <4                        | 8              | 1.48 (1.27, 1.71)    | <0.01   |                                | 0.49          | 0%             |                        |
