# Supplementary material for: Prognostic Value of Pretreatment Lymphocyte-to-Monocyte Ratio in Lung Cancer: A Systematic Review and Meta-Analysis
Source: PubMed Central journal article supplement — Technol Cancer Res Treat. 2021 Feb 12;20:1533033820983085. doi: 10.1177/1533033820983085 (PMC7887688; doi:10.1177/1533033820983085), 2021-02-12
Supplement: sj-pdf-2-tct-10.1177_1533033820983085.pdf [file sj-pdf-2-tct-10.1177_1533033820983085.pdf]

**STable2 Hierarchical analysis of correlation between LMR and OS in lung cancer patients**

|                           | No. of studies | Combined HR (95% CI) | P value | P <sub>interaction</sub> value | Heterogeneity |                | Residual heterogeneity |
|---------------------------|----------------|----------------------|---------|--------------------------------|---------------|----------------|------------------------|
|                           |                |                      |         |                                | P             | I <sup>2</sup> |                        |
| <b>Total OS</b>           | 23             | 1.61 (1.45, 1.79)    | <0.01   | —                              | 0.01          | 46%            | —                      |
| <b>Histology</b>          |                |                      |         |                                |               |                | 30%                    |
| NSCLC                     | 20             | 1.69 (1.52, 1.88)    | <0.01   |                                | 0.13          | 27%            |                        |
| SCLC                      | 2              | 1.21 (0.87, 1.67)    | 0.25    | 0.12                           | 0.12          | 59%            |                        |
| NSCLC and SCLC            | 1              | 1.51 (1.26, 1.80)    | <0.01   |                                | —             | —              |                        |
| <b>Tumor stage</b>        |                |                      |         |                                |               |                | 14%                    |
| ED                        | 11             | 1.89 (1.64, 2.17)    | <0.01   |                                | 0.68          | 0%             |                        |
| LD                        | 9              | 1.53 (1.39, 1.69)    | <0.01   | <0.01                          | 0.12          | 38%            |                        |
| LD and ED                 | 3              | 1.19 (1.01, 1.40)    | 0.06    |                                | 0.22          | 34%            |                        |
| <b>Treatment</b>          |                |                      |         |                                |               |                | 24%                    |
| Chemotherapy              | 6              | 1.77 (1.50, 2.09)    | <0.01   |                                | 0.54          | 0%             |                        |
| TKI                       | 2              | 1.80 (0.87, 3.70)    | 0.11    |                                | 0.24          | 28%            |                        |
| SABR                      | 1              | 1.84 (1.01, 3.34)    | 0.05    |                                | —             | —              |                        |
| Chemotherapy+TKI          | 1              | 2.49 (1.72, 3.60)    | <0.01   | 0.03                           | —             | —              |                        |
| Surgery                   | 7              | 1.58 (1.29, 1.94)    | <0.01   |                                | 0.05          | 52%            |                        |
| Chemotherapy+Radiotherapy | 3              | 1.22 (0.99, 1.50)    | 0.06    |                                | 0.22          | 34%            |                        |
| Immunology                | 3              | 1.71 (1.27, 2.31)    | <0.01   |                                | 0.91          | 0%             |                        |
| <b>Sample size</b>        |                |                      |         |                                |               |                | 41%                    |
| >300                      | 10             | 1.48 (1.31, 1.67)    | <0.01   |                                | 0.04          | 49%            |                        |
| <300                      | 13             | 1.80 (1.53, 2.13)    | <0.01   | 0.06                           | 0.12          | 33%            |                        |
| <b>Cut-off value</b>      |                |                      |         |                                |               |                | 45%                    |
| >4                        | 8              | 1.69 (1.41, 2.03)    | <0.01   |                                | 0.10          | 41%            |                        |
| <4                        | 15             | 1.56 (1.37, 1.78)    | <0.01   | 0.48                           | 0.02          | 47%            |                        |
